# Supplementary material for: Proteomic analysis reveals some common proteins in the kidney stone matrix
Source: PeerJ. 2021 Jul 27;9:e11872. doi: 10.7717/peerj.11872 (PMC8323604; doi:10.7717/peerj.11872)
Supplement: Supplemental Information 1 [file peerj-09-11872-s001.xlsx]

## Sheet: Reference-8
Years	Authors	Number of proteins identified	Proteins identified	Gene name	ENSEMBL: ID
2007	Mushtaq et al.	4	Myeloperoxidase	MPO	ENSG00000005381
			α-defensin	None-specific	None-specific
			Osteopontin	SPP1	ENSG00000118785
			S100A9	S100A9	ENSG00000163220

## Sheet: Reference-9
Years	Authors	Number of proteins identified	Proteins identified	Gene name	ENSEMBL: ID
2008	Canales et al.	68	Clusterin, α-chain	CLUL1	ENSG00000079101
			Heat shock 27 kDa protein	HSPB1	ENSG00000106211
			Perioxiredoxin 2	PRDX2	ENSG00000167815
			α1 Anti-trypsin	SERPINA1	ENSG00000197249
			α1B Glycoprotein	GP1BA	ENSG00000185245
			Calgranulin C	S100A12	ENSG00000163221
			cathepsin G	CTSG	ENSG00000100448
			Complement C3	C3	ENSG00000125730
			Complement factor H	CFH	ENSG00000000971
			Defensin alpha-1	DEFA1	ENSG00000206047
			Eosinophilic cationic protein	RNASE3	ENSG00000169397
			Ig kappa chain	None-specific	None-specific
			Ig kappa light chain	None-specific	None-specific
			Ig heavy chain	None-specific	None-specific
			IgG2 heavy chain	None-specific	None-specific
			IgG light chain	None-specific	None-specific
			IgA light chain	None-specific	None-specific
			Limitrin	MXRA8	ENSG00000162576
			Lysozyme	LYZ	ENSG00000090382
			MASP-2	MASP2	ENSG00000009724
			Myeloperoxidase precursor	MPO	ENSG00000005381
			Orosomucoid	ORM1	ENSG00000229314
				ORM2	ENSG00000228278
			Albumin	ALB	ENSG00000163631
			Apolipoprotein A-1	APOA1	ENSG00000118137
			Apolipoprotein D	APOD	ENSG00000189058
			Fibronectin	FN1	ENSG00000115414
			Histidine-rich glycoprotein	HRG	ENSG00000113905
			Plasminogen	PLG	ENSG00000122194
			Serum amyloid P	APCS	ENSG00000132703
			Vitronectin (S-protein)	VTN	ENSG00000109072
			Hemoglobin alpha chain	HBA1	ENSG00000206172
				HBA2	ENSG00000188536
			Hemoglobin beta chain	HBB	ENSG00000244734
			Transferrin	TF	ENSG00000091513
			Carbonic anhydrase 1	CA1	ENSG00000133742
			Dimethylarginine dimethylaminohydrolase 2	DDAH2	ENSG00000213722
			Fibrinogen alpha chain	FGA	ENSG00000171560
			Fibrinogen beta chain	FGB	ENSG00000171564
			Fibrinogen gamma chain	FGG	ENSG00000171557
			Glyceraldehyde-3-phosphate dehydrogenase	GAPDH	ENSG00000111640
			Osteopontin	SPP1	ENSG00000118785
			α1 Actinin	ACTN1	ENSG00000072110
			α2 Actinin	ACTA2	ENSG00000107796
			β Actinin	ACTB	ENSG00000075624
			Biglycan	BGN	ENSG00000182492
			Collagen α1 (I) chain	COL1A1	ENSG00000142156
			Collagen α2 (I) chain	COL1A2	ENSG00000164692
			Collagen α1 (VI) chain	COL6A1	ENSG00000142156
			Myosin heavy chain IIa (non-muscle)	MYH9	ENSG00000100345
			Ceruloplasmin	CP	ENSG00000047457
			Lectin, mannose-binding 2	LMAN2	ENSG00000169223
			Tamm-Horsfall protein	UMOD	ENSG00000169344
			Voltage-dependent calcium channel	CACNA1C	ENSG00000151067
			Insulin-like growth factor 1	IGF1	ENSG00000017427
			Longation factor 1	EEF1A1	ENSG00000156508
			MYL-1	MYL1	ENSG00000168530
			Novel protein (transcription factor)	None-specific	None-specific
			Urogastrone	EGF	ENSG00000138798
			Calgranulin A	S100A8	ENSG00000143546
			Calgranulin B	S100A9	ENSG00000163220
			Cyclophilin	None-specific	None-specific
			β-1B glycoprotein (hemopexin)	HPX	ENSG00000110169
			Kininogen 1	KNG1	ENSG00000113889
			Protein C inhibitor	None-specific	None-specific
			Prothrombin	F2	ENSG00000180210
			Vitamin K-dependent protein Z	PROZ	ENSG00000126231
			Urokinase plasminogen activator	PLAUR	ENSG00000011422
			S100 calcium binding protein P	S100P	ENSG00000163993
			Man9-mannosidase	MAN1A1	ENSG00000111885

## Sheet: Reference-10
Years	Authors	Number of proteins identified	Proteins identified	Gene name	ENSEMBL: ID
2008	Merchant et al.	158	S100 calcium-binding protein A9	S100A9	ENSG00000163220
			S100 calcium-binding protein A8	S100A8	ENSG00000143546
			apolipoprotein A-I precursor	APOA1	ENSG00000118137
			uromodulin; Tamm-Horsfall glycoprotein	UMOD	ENSG00000169344
			albumin precursor	ALB	ENSG00000163631
			coagulation factor II precursor; prothrombin	F2	ENSG00000180210
			secreted phosphoprotein 1(osteopontin, bone sialoprotein)	SPP1	ENSG00000118785
			protein Z, vitamin K-dependent plasma glycoprotein	PROZ	ENSG00000126231
			apolipoprotein C-I precursor	APOC1	ENSG00000130208
			hemoglobin beta chain	HBB	ENSG00000244734
			nucleophosmin 1	NPM1	ENSG00000181163
			splicing factor, arginine/serine-rich 1	SRSF1	ENSG00000136450
			Alpha-2HS-glycoprotein	AHSG	ENSG00000145192
			H4 histone family, member E	H4C11	ENSG00000197238
			histidine-rich glycoprotein precursor	HRG	ENSG00000113905
			coagulation factor X precursor; prothrombinase; factor Xa	F10	ENSG00000126218
			matrix Gla protein	MGP	ENSG00000111341
			Sulfoglucuronyl carbohydrate binding protein; Amphoterin	HMGB1	ENSG00000189403
			serum amyloid P component precursor	APCS	ENSG00000132703
			lactotransferrin	LTF	ENSG00000012223
			mannan-binding lectin serine protease 2 isoform 2 precursor	MASP2	ENSG00000009724
			nucleolin	NCL	ENSG00000115053
			apolipoprotein D precursor	APOD	ENSG00000189058
			activated RNA polymerase II transcription cofactor 4	SUB1	ENSG00000113387
			apolipoprotein E precursor	APOE	ENSG00000130203
			heat shock 27kDa protein 1	HSPB1	ENSG00000106211
			SET translocation (myeloid leukemia-associated)	SET	ENSG00000119335
			cytokeratin 1	KRT1	ENSG00000167768
			heterogeneous nuclear ribonucleoprotein C isoform a	HNRNPC	ENSG00000092199
			calcium-activated potassium channel beta 2 subunit	KCNMB2	ENSG00000197584
			vitronectin precursor	VTN	ENSG00000109072
			myosin, heavy polypeptide 9, non-muscle	MYH9	ENSG00000100345
			fibrinogen, beta chain preproprotein	FGB	ENSG00000171564
			unactive progesterone receptor, 23 kD	PTGES3	ENSG00000110958
			acidic (leucine-rich) nuclear phosphoprotein 32 family, member A	ANP32A	ENSG00000140350
			cathepsin G preproprotein	CTSG	ENSG00000100448
			splicing factor, arginine/serine-rich 3	SRSF3	ENSG00000112081
			cytokeratin 7	KRT7	ENSG00000135480
			fibrinogen, gamma chain isoform gamma-B precursor	FGG	ENSG00000171557
			complement component 3 precursor	C3	ENSG00000125730
			myeloperoxidase	MPO	ENSG00000005381
			RAB13, member RAS oncogene family	RAB13	ENSG00000143545
			heparin-binding EGF-like growth factor	HBEGF	ENSG00000113070
			nascent-polypeptide-associated complex alpha polypeptide	NACA	ENSG00000196531
			heat shock 90kDa protein 1, alpha	HSP90AA1	ENSG00000080824
			keratin 9	KRT9	ENSG00000171403
			ubiquitin B precursor	UBB	ENSG00000170315
			superoxide dismutase 3, extracellular	SOD3	ENSG00000109610
			heat shock 90kDa protein 1, beta	HSP90AB1	ENSG00000096384
			Prosaposin (sphingolipid activator protein-1)	PSAP	ENSG00000197746
			N-acylsphingosine amidohydrolase (acid ceramidase) 1 preproprotein isoform a	ASAH1	ENSG00000104763
			AMP-activated protein kinase beta 2 non-catalytic subunit	PRKAB2	ENSG00000131791
			cAMP-dependent protein kinase, regulatory subunit alpha 2	PRKAR2A	ENSG00000114302
			insulin-like growth factor binding protein 5	IGFBP5	ENSG00000115461
			PREDICTED: hypothetical protein XP_373506	None-specific	None-specific
			argininosuccinate synthetase	ASS1	ENSG00000130707
			hypothetical protein DKFZP434G1411	HMGCLL1	ENSG00000146151
			ankyrin repeat and SOCS box-containing 17	ASB17	ENSG00000154007
			protein C (inactivator of coagulation factors Va and VIIIa)	PROC	ENSG00000115718
			fibrinogen, alpha chain isoform alpha preproprotein	FGA	ENSG00000171560
			clusterin isoform 1	CLU	ENSG00000120885
			alpha-1-microglobulin/bikunin precursor	AMBP	ENSG00000106927
			proto-oncogene Wnt7a protein	WNT7A	ENSG00000154764
			arginine/serine-rich splicing factor 6	SRSF6	ENSG00000124193
			heat shock 70kD protein binding protein	ST13	ENSG00000100380
			similar to RIKEN cDNA 4732495G21 gene	None-specific	None-specific
			alpha 1 actin precursor	ACTA1	ENSG00000143632
			DEK gene	DEK	ENSG00000124795
			syndecan 4 precursor	SDC4	ENSG00000124145
			hypothetical protein XP_499085	None-specific	None-specific
			complement component 4 binding protein, alpha	C4BPA	ENSG00000123838
			haptoglobin	HP	ENSG00000257017
			plasminogen	PLG	ENSG00000122194
			apolipoprotein A-IV precursor	APOA4	ENSG00000110244
			NAPSA gene product	NAPSA	ENSG00000131400
			proteasome 26S ATPase subunit 5	PSMC5	ENSG00000087191
			kininogen 1	KNG1	ENSG00000113889
			cytokeratin 18	KRT18	ENSG00000111057
			hypothetical protein FLJ35382	SDE2	ENSG00000143751
			secreted phosphoprotein 2, 24kDa	SPP2	ENSG00000072080
			limitrin	MXRA8	ENSG00000162576
			eukaryotic translation initiation factor 5	EIF5	ENSG00000100664
			cytokeratin 13	KRT13	ENSG00000171401
			hypothetical protein FLJ20291	CWC25	ENSG00000276761
			Protein S, alpha	PROS1	ENSG00000184500
			eukaryotic translation elongation factor 1 alpha 1	EEF1A1	ENSG00000156508
			hypothetical protein FLJ11036	TMEM40	ENSG00000088726
			coagulation factor IX	F9	ENSG00000101981
			G patch domain and KOW motifs; T54 protein	GPKOW	ENSG00000068394
			l(3)mbt-like 2 isoform a	L3MBTL2	ENSG00000100395
			type II cytoskeletal 8	KRT8	ENSG00000170421
			non-POU domain containing, octamer-binding	NONO	ENSG00000147140
			cytochrome P450, family 4, subfamily X, polypeptide 1	CYP4X1	ENSG00000186377
			S-adenosylhomocysteine hydrolase-like 1	AHCYL1	ENSG00000168710
			ATP synthase, H+ transporting, mitochondrial F1 complex, alpha subunit isoform a	ATP5F1A	ENSG00000152234
			tight junction protein 4 (peripheral)	TJAP1	ENSG00000137221
			tumor rejection antigen (gp96) 1	HSP90B1	ENSG00000166598
			phosphoprotein 75	SP110	ENSG00000135899
			epidermal growth factor (beta-urogastrone)	EGF	ENSG00000138798
			dystrobrevin, beta isoform 1	DTNB	ENSG00000138101
			tumor necrosis factor, alpha-induced protein 2	TNFAIP2	ENSG00000185215
			protein disulfide isomerase related protein (calcium-binding protein, intestinal-related)	PDIA4	ENSG00000155660
			F-box and leucine-rich repeat protein 18	FBXL18	ENSG00000155034
			Ras association and pleckstrin homology domains 1 isoform 2	RAPH1	ENSG00000173166
			ARG99 protein	TMTC1	ENSG00000133687
			MICAL-like 2 isoform 2	MICALL2	ENSG00000164877
			PABP1-dependent poly A-specific ribonuclease subunit PAN3; PABP-dependent poly(A) nuclease 3	PAN3	ENSG00000152520
			PREDICTED: inositol polyphosphate-5-phosphatase, 75kDa	None-specific	None-specific
			amyloid beta A4 protein precursor, isoform b	APP	ENSG00000142192
			amyloid precursor protein homolog HSD-2	APLP2	ENSG00000084234
			similar to Extracellular matrix protein 2 precursor (Matrix glycoprotein SC1/ECM2)	ECM2	ENSG00000106823
			PREDICTED: KIAA1026 protein	KAZN	ENSG00000189337
			DEA/H (Asp-Glu-Ala-His) box polypeptide 15	DHX15	ENSG00000109606
			vacuolar protein sorting 16 isoform 1	VPS16	ENSG00000215305
			chromosome 18 open reading frame 34	CCDC178	ENSG00000166960
			polymerase (DNA directed) kappa	POLK	ENSG00000122008
			origin recognition complex subunit 4	ORC4	ENSG00000115947
			PWP2 periodic tryptophan protein homolog	PWP2	ENSG00000241945
			scaffold attachment factor B; scaffold attachment factor B1	SAFB	ENSG00000160633
			cytokeratin 14	KRT14	ENSG00000186847
			argininosuccinate lyase	ASL	ENSG00000126522
			GTF2I repeat domain containing 1 isoform 2	GTF2IRD1	ENSG00000006704
			PREDICTED: hypothetical protein DKFZp434I1610	None-specific	None-specific
			eukaryotic translation initiation factor 3, subunit 8 (110kD)	EIF3C	ENSG00000184110
			PREDICTED: hypothetical protein XP_374763	None-specific	None-specific
			PREDICTED: similar to bA13B9.3 (novel protein similar to KRT8)	None-specific	None-specific
			cytoplasmic linker 2 isoform 2; Williams-Beuren syndrome chromosome region 4	CLIP2	ENSG00000106665
			chromosome 14 open reading frame 49	SYNE3	ENSG00000176438
			hypothetical protein FLJ13089	NAA25	ENSG00000111300
			synaptonemal complex protein 1	SYCP1	ENSG00000198765
			PREDICTED: formin binding protein 3	None-specific	None-specific
			proline-rich tyrosine kinase 2	PTK2B	ENSG00000120899
			tight junction protein 2 (zona occludens 2) isoform 2	TJP2	ENSG00000119139
			chromosome 13 open reading frame 22	USPL1	ENSG00000132952
			erythrocyte membrane protein band 4.1-like 3	EPB41L3	ENSG00000082397
			AP-3 complex beta-3A subunit	AP3B1	ENSG00000132842
			TATA element modulatory factor 1	TMF1	ENSG00000144747
			dishevelled-associated activator of morphogenesis 1	DAAM1	ENSG00000100592
			apolipoprotein B precursor	APOB	ENSG00000084674
			KIAA0146 protein	SPIDR	ENSG00000164808
			similar to hypothetical protein	None-specific	None-specific
			TIP120 protein	CAND1	ENSG00000111530
			limbin	EVC2	ENSG00000173040
			zinc finger transcription factor TRPS1	TRPS1	ENSG00000104447
			peroxisome biogenesis factor 1	PEX1	ENSG00000127980
			treacle; Treacher Collins-Franceschetti syndrome protein 1	TCOF1	ENSG00000070814
			DKFZP434I092 protein	RGS22	ENSG00000132554
			RAB6 interacting protein 1	DENND5A	ENSG00000184014
			lymphocyte antigen 64 homolog, radioprotective 105kDa	CD180	ENSG00000134061
			trinucleotide repeat containing 15; Grb10 interacting GYF protein 2	GIGYF2	ENSG00000204120
			ankyrin repeat domain 30A; breast cancer antigen NY-BR-1	ANKRD30A	ENSG00000148513
			RAD50 homolog isoform 1; RAD50 (S. cerevisiae) homolog	RAD50	ENSG00000113522
			heat shock protein 75	TRAP1	ENSG00000126602
			Hexokinase domain containing 1	HKDC1	ENSG00000156510
			PREDICTED: KIAA1529	None-specific	None-specific
			similar to RIKEN cDNA 9330196J05	ARSI	ENSG00000183876
			periaxin	PRX	ENSG00000105227
			AT-hook transcription factor	AKNA	ENSG00000106948
			Stone protein matrix (at least detected in 2 of 3 stones): 58
			S100 calcium-binding protein A9	S100A9	ENSG00000163220
			Apolipoprotein A-I	APOA1	ENSG00000118137
			Tamm-Horsfall protein	UMOD	ENSG00000169344
			S100 calcium-binding protein A8	S100A8	ENSG00000143546
			Osteopontin (secreted phosphoprotein 1)	SPP1	ENSG00000118785
			Coagulation factor II	F2	ENSG00000180210
			Albumin	ALB	ENSG00000163631
			Protein Z, vitamin K-dependent plasma glycoprotein	PROZ	ENSG00000126231
			SET translocation	SET	ENSG00000119335
			Histidine-rich glycoprotein	HRG	ENSG00000113905
			H4 histone family	H4C11	ENSG00000197238
			Splicing factor, arginine/serine-rich 3	SRSF3	ENSG00000112081
			Splicing factor, arginine/serine-rich 1	SRSF1	ENSG00000136450
			Apolipoprotein D	APOD	ENSG00000189058
			Nucleophosmin 1	NPM1	ENSG00000181163
			Vitronectin	VTN	ENSG00000109072
			Serum amyloid P component	APCS	ENSG00000132703
			Prostate stem cell antigen	PSCA	ENSG00000167653
			α-2-HS-glycoprotein	AHSG	ENSG00000145192
			Apolipoprotein E	APOE	ENSG00000130203
			Keratin 7	KRT7	ENSG00000135480
			Lactotransferrin	LTF	ENSG00000012223
			Heat shock protein 90-kDa	HSP90AA1	ENSG00000080824
			Superoxide dismutase 3, extracellular	SOD3	ENSG00000109610
			Myosin, heavy polypeptide 9, nonmuscle	MYH9	ENSG00000100345
			Myeloperoxidase	MPO	ENSG00000005381
			Nucleolin	NCL	ENSG00000115053
			Clusterin isoform 1	CLUAP1	ENSG00000103351
			Mannan-binding lectin serine protease 2	MASP2	ENSG00000009724
			Syndecan 4	SDC4	ENSG00000124145
			Coagulation factor X	F10	ENSG00000126218
			Heat shock 27-kDa protein 1	HSPB1	ENSG00000106211
			Secreted phosphoprotein 2, 24 kDa	SPP2	ENSG00000072080
			Transmembrane protein 40	TMEM40	ENSG00000088726
			Fibrinogen, beta-chain	FGB	ENSG00000171564
			Complement component 3	C3	ENSG00000125730
			Apolipoprotein A-IV	APOA4	ENSG00000110244
			Kazrin isoform A	KAZN	ENSG00000189337
			Heat shock 90-kDa protein 1	HSP90AA1	ENSG00000080824
			Fibrinogen, gamma chain	FGG	ENSG00000171557
			Keratin 14	KRT14	ENSG00000186847
			Fibrinogen	FGG	ENSG00000171557
			Keratin 8	KRT8	ENSG00000170421
			Wingless-type MMTV integration site family	WNT7A	ENSG00000154764
			Hypothetical protein LOC345651	None-specific	None-specific
			N-acylsphingosine amidohydrolase 1	ASAH1	ENSG00000104763
			Complement component 4 binding protein	C4BPB	ENSG00000123843
				C4BPA	ENSG00000123838
			Origin recognition complex subunit 4	ORC4	ENSG00000115947
			Argininosuccinate lyase isoform 1	ASL	ENSG00000126522
			Hypothetical protein LOC347265	None-specific	None-specific
			Prosaposin isoform a	PSAP	ENSG00000197746
			TNF receptor-associated protein 1	TRAF1	ENSG00000056558
			CD180 antigen	CD180	ENSG00000134061
			Arylsulfatase I	ARSI	ENSG00000183876
			Hexokinase domain containing 1	None-specific	None-specific
			Eukaryotic translation initiation factor 3	EIF3C	ENSG00000184110
			Hypothetical protein LOC57653	None-specific	None-specific
			Apolipoprotein B	APOB	ENSG00000084674

## Sheet: Reference-11
Years	Authors	Number of proteins	Proteins identified	Gene name	ENSEMBL: ID
2008	Chen et al.	11	Leukocyte elastase Precursor	ELANE	ENSG00000197561
			Cathepsin G precursor	CTSG	ENSG00000100448
			Azurocidin precursor	AZU1	ENSG00000172232
			Myeloblastin precursor	PRTN3	ENSG00000196415
			Calgranulin B	S100A9	ENSG00000163220
			Eosinophil cationic protein precursor	RNASE3	ENSG00000169397
			Lysozyme C precursor	LYZ	ENSG00000090382
			Neutrophil defensin 3 precursor	DEFA3	ENSG00000239839
			Calgranulin A	S100A8	ENSG00000143546
			Calgranulin C	S100A12	ENSG00000163221
			Histone H4	H4C14	ENSG00000270882

## Sheet: Reference-12
Years	Authors	Number of proteins	Proteins identified	Gene name	ENSEMBL: ID
2009	Canales et al.	33	Histone 1	HDAC1	ENSG00000116478
			Tamm-Horsfall protein	UMOD	ENSG00000169344
			Protein C	PROC	ENSG00000115718
			Prothrombin	F2	ENSG00000180210
			α1 anti-trypsin	SERPINA1	ENSG00000197249
			Anti-TNFα antibody	TNF	ENSG00000232810
			Azurocidin 1	AZU1	ENSG00000172232
			Calgranulin A	S100A8	ENSG00000143546
			Calgranulin B	S100A9	ENSG00000163220
			Cathepsin G	CTSG	ENSG00000100448
			Complement C3	C3	ENSG00000125730
			Defensin alpha-1	DEFA1	ENSG00000206047
			Eosinophilic cationic protein	RNASE3	ENSG00000169397
			Ig light chain	None-specific	None-specific
			IgG2	None-specific	None-specific
			IgG heavy chain	None-specific	None-specific
			IgG protein	None-specific	None-specific
			Ig kappa chain	None-specific	None-specific
			Ig kappa light chain	None-specific	None-specific
			Lactoferrin	LTF	ENSG00000012223
			Lysozyme C	LYZ	ENSG00000090382
			Myeloblastin	PRTN3	ENSG00000196415
			Myeloperoxidase	MPO	ENSG00000005381
			Neutrophil elastase	ELANE	ENSG00000197561
			Neutrophil lipocalin	LCN1	ENSG00000160349
				LCN2	ENSG00000148346
			Orosomucoid (α1 A glycoprotein)	ORM1	ENSG00000229314
			Radixin	RDX	ENSG00000137710
			Thioredoxin peroxidase α chain	TXNRD1	ENSG00000198431
			Albumin	ALB	ENSG00000163631
			Histidine-rich glycoprotein	HRG	ENSG00000113905
			Plasminogen	PLG	ENSG00000122194
			Hemoglobin alpha chain	HBA1	ENSG00000206172
				HBA2	ENSG00000188536
			Hemoglobin beta chain	HBB	ENSG00000244734

## Sheet: Reference-13
Years	Authors	Number of proteins	Proteins identified	Gene name	ENSEMBL: ID
2010	Thurgood et al.	HA Crystal (36)	Tamm-Horsfall glycoprotein	UMOD	ENSG00000169344
			Heparan sulfate proteoglycan	HSPG2	ENSG00000142798
			Protein S100A9 (calgranulin B)	S100A9	ENSG00000163220
			Pro epidermal growth factor	EGF	ENSG00000138798
			Inter-α-trypsin inhibitor heavy chain 4	ITIH4	ENSG00000055955
			α1-microglobulin/bikunin (AMBP)	AMBP	ENSG00000106927
			Protein C inhibitor (Serpin A5)	SERPINA5	ENSG00000188488
			Osteopontin	SPP1	ENSG00000118785
			Prothrombin	F2	ENSG00000180210
			IGκV1-5	IGκV1-5	None-specific
			Protein S100 A8 (Calgranulin A)	S100A8	ENSG00000143546
			α-2-HS glycoprotein (fetuin A)	AHSG	ENSG00000145192
			Transthyretin CD14 monocyte differentiation antigen	CD14	ENSG00000170458
			Growth inhibiting protein 12	LTF	ENSG00000012223
			Extracellular superoxide dismutase [Cu-Zn]	SOD1	ENSG00000142168
				SOD3	ENSG00000109610
			Serpin B4	SERPINB4	ENSG00000206073
			Igκ chain V-III region HAH	None-specific	None-specific
			IGHA1 protein	IGHA1	ENSG00000211895
			Vitamin K dependent protein Z	PROZ	ENSG00000126231
			α-1-antichymotrypsin	SERPINA3	ENSG00000196136
			α-1-antitrypsin	SERPINA1	ENSG00000197249
			Lysosomal α glucosidase	GAA	ENSG00000171298
			Serpin B3	SERPINB3	ENSG00000206073
			Serpina1 PRO 2275	SERPINA1	ENSG00000197249
			Protein S100A7	S100A7	ENSG00000143556
			Albumin protein	ALB	ENSG00000163631
			Aminopeptidase N	ANPEP	ENSG00000166825
			Albumin	ALB	ENSG00000163631
			Vesicular integral membrane protein VIP36	LMAN2	ENSG00000169223
			Annexin A1	ANXA1	ENSG00000135046
			Vasorin	VASN	ENSG00000168140
			Ubiquitin and ribosomal protein S27	RPS27A	ENSG00000143947
			Annexin A2	ANXA2	ENSG00000182718
			Insulin-like GF binding protein	EGFR	ENSG00000146648
			Non secretory ribonuclease	None-specific	None-specific
		Brushite Crystal (65)	Protein C inhibitor (Serpin A5)	SERPINA5	ENSG00000188488
			Tamm-Horsfall glycoprotein	UMOD	ENSG00000169344
			IGκV1-5	IGκV1-5	None-specific
			Annexin A1	ANXA1	ENSG00000135046
			Protein S100-A9 (calgranulin B)	S100A9	ENSG00000163220
			Uncharacterized protein ENSP00000382160	None-specific	None-specific
			LDL receptor-related protein	LRP1	ENSG00000123384
			Ceruloplasmin	CP	ENSG00000047457
			Complement C3	C3	ENSG00000125730
			Osteopontin	SPP1	ENSG00000118785
			Complement C4-A	C4A	ENSG00000244731
			Collagen α-1 (XV) chain	COL15A1	ENSG00000204291
			Vasorin	VASN	ENSG00000168140
			Vesicular integral protein VIP36	LMAN2	ENSG00000169223
			Gelsolin	GSN	ENSG00000148180
			Inter-R-trypsin inhibitor heavy chain 4	None-specific	None-specific
			Collagen α-1 (VI) chain	COL6A1	ENSG00000142156
			Cubilin	CUBN	ENSG00000107611
			Angiotensinogen	AGT	ENSG00000135744
			Heparan sulfate proteoglycan	HSPG2	ENSG00000142798
			CD14 monocyte differentiation antigen	CD14	ENSG00000170458
			Plasma serine C1 inhibitor	SERPINC1	ENSG00000117601
			Carboxyl ester lipase	CEL	ENSG00000170835
			HMW kininogen	KNG1	ENSG00000113889
			N-acetylmuramoyl-L-alanine	PGLYRP2	ENSG00000161031
			α-1-antitrypsin	SERPINA1	ENSG00000197249
			α-1-antichymotrypsin	SERPINA3	ENSG00000196136
			Serpina1 PRO 2275	SERPINA1	ENSG00000197249
			α-N-acetyl-glucosaminidase	HGSNAT	ENSG00000165102
			Mannan-binding lectin serine protease	MASP1	ENSG000001272414
				MASP2	ENSG00000009724
			Polymeric Ig receptor	PIGR	ENSG00000162896
			Fructose bisphosphate aldolase B	ALDOB	ENSG00000136872
			IGHA1 protein	IGHA1	ENSG00000211895
			α-1 microglobulin bikunin (AMBP)	AMBP	ENSG00000106927
			Tripeptidyl-peptidase 1	TPP1	ENSG00000166340
			C4B1	C4B	ENSG00000224389
			6-phospho gluconolactonase	PGLS	ENSG00000130313
			Phosphatidylcholine-sterol acyltransferase	LCAT	ENSG00000213398
			Protein UNQ773/PRO1567	ZG16B	ENSG00000162078
			IGλ protein	IGLC1	None-specific
			α3 type VI collagen	COL6A3	ENSG00000163359
			Prothrombin fragment	F2	ENSG00000180210
			Vitamin K-dependent Protein Z	PROZ	ENSG00000126231
			Factor VII	F7	ENSG00000057593
			Carboxypeptidase E	CPE	ENSG00000109472
			Cadherin-11	CDH11	ENSG00000140937
			Fibulin-5	FBLN5	ENSG00000140092
			Nidogen-1	NID1	ENSG00000116962
			ACPP protein	ACP3	ENSG00000014257
			Igκ chain V-III region HAH precursor	None-specific	None-specific
			Chondroitin sulfate proteoglycan 4	CSPG4	ENSG00000173546
			Aminopeptidase N	ANPEP	ENSG00000166825
			Hemicentin 1	HMCN1	ENSG00000143341
			Galectin-3 binding protein	LGALS3BP	ENSG00000108679
			Ganglioside GM2 activator	GM2A	ENSG00000196743
			Similar to Ig κ chain V-IV region	None-specific	None-specific
			Ig κ chain V-IV region	None-specific	None-specific
			MAN1A1	MAN1A1	ENSG00000111885
			α2-HS glycoprotein	AHSG	ENSG00000145192
			EGF-containing fibulin-like	EFEMP1	ENSG00000115380
				EFEMP2	ENSG00000172638
			Apolipoprotein D	APOD	ENSG00000189058
			Hyaluronidase-1	HYAL1	ENSG00000114378
			Similar to complement C3	None-specific	None-specific
			IGHM FJ00385 protein	IGHM	None-specific
			α1B-glycoprotein	A1BG	ENSG00000121410
		UA Crystal (7)	Protein C inhibitor (Serpin A5)	SERPINA5	ENSG00000188488
			Cornulin	CRNN	ENSG00000143536
			HMW Kininogen-1	KNG1	ENSG00000113889
			Protein S100 A9 (calgranulin B)	S100A9	ENSG00000163220
			Desmoplakin	DSP	ENSG00000096696
			Plasma protease C1 inhibitor	SERPING1	ENSG00000117601
			Desmoglein-1	DSG1	ENSG00000134760

## Sheet: Reference-14
Years	Authors	Number of proteins	Proteins identified	Gene name	ENSEMBL: ID
2010	Thurgood et al.	COD Crystal (34)	Osteopontin	SPP1	ENSG00000118785
			IGκV1-5	IGKV1-5	ENSG00000243466
			Protein S100A9	S100A9	ENSG00000163220
			Annexin A1	ANXA1	ENSG00000135046
			plasma serine protease inhibitor	SERPINA5	ENSG00000188488
			HMW Kininogen-1	CFAP97	ENSG00000164323
			IαI	None-specific	None-specific
			AMBP	AMBP	ENSG00000106927
			heparan sulfate proteoglycan	HSPG2	ENSG00000142798
			vasorin	VASN	ENSG00000168140
			Collagen α1 (VI) chain	COL6A1	ENSG00000142156
			Collagen α1 (XV) chain	COL15A1	ENSG00000204291
			Pro EGF	EGF	ENSG00000138798
			Protein S100A8	S100A8	ENSG00000143546
			Uromodulin	UMOD	ENSG00000169344
			Prothrombin	F2	ENSG00000180210
			IGHA1 protein	IGHA1	ENSG00000211895
			Monocyte differentiation antigen CD14	CD14	ENSG00000170458
			Igκ chain V-III region HAH	None-specific	None-specific
			Hornerin	HRNR	ENSG00000197915
			Desmoglein-1	DSG1	ENSG00000134760
			Cystatin-A	CSTA	ENSG00000121552
			Ifapsoriasin	FLG2	ENSG00000143520
			Ubiquitin and ribosomal protein S27a	RPS27A	ENSG00000143947
			Dermcidin	DCD	ENSG00000161634
			Annexin A2	ANXA2	ENSG00000182718
			VIP36	LMAN2	ENSG00000169223
			SERPINB4	SERPINB4	ENSG00000206073
			Plasma protease C1 inhibitor	SERPING1	ENSG00000149131
			Annexin A2 like protein	ANXA2P2	ENSG00000231991
			Serpin B13	SERPINB13	ENSG00000197641
			Albumin	ALB	ENSG00000163631
			Tau-tubulin kinase	TTBK1	ENSG00000146216
				TTBK2	ENSG00000128881
			CDNA FLJ34965 fis, clone NTONG2004308	None-specific	None-specific
		COM Crystal (14)	Osteopontin	SPP1	ENSG00000118785
			Prothrombin fragment	F2	ENSG00000180210
			Protein S100A9	S100A9	ENSG00000163220
			IGκV1-5	None-specific	None-specific
			Protein S100A8	S100A8	ENSG00000143546
			Hornerin	HRNR	ENSG00000197915
			Histone H4	None-specific	None-specific
			Syndecan-4	SDC4	ENSG00000124145
			SPP1 isoform C	SPP1	ENSG00000118785
			Vitamin K dependent protein Z	PROZ	ENSG00000126231
			AMBP	AMBP	ENSG00000106927
			IαI	None-specific	None-specific
			Pro EGF	EGF	ENSG00000138798
			γ-glutamyl hydrolase	GGH	ENSG00000137563

## Sheet: Reference-15
Years	Authors	Number of proteins	Proteins identified	Gene name	ENSEMBL: ID
2010	Canales et al.	CaOx (49)	Calgranulin B	S100A9	ENSG00000163220
			Calgranulin A	S100A8	ENSG00000143546
			Hemoglobin α chain	HBA1	ENSG00000206172
				HBA2	ENSG00000188536
			Hemoglobin beta chain	HBB	ENSG00000244734
			Albumin	ALB	ENSG00000163631
			Fibrinogen gamma chain	FGG	ENSG00000171557
			Tamm-Horsfall protein	UMOD	ENSG00000169344
			α1 Antitrypsin	SERPINA1	ENSG00000197249
			Vitronectin	VTN	ENSG00000109072
			Defensin α-1	DEFA1	ENSG00000206047
			Osteopontin	SPP1	ENSG00000118785
			Plasminogen	PLG	ENSG00000122194
			Apolipoprotein D	APOD	ENSG00000189058
			Eosinophilic cationic protein	RNASE3	ENSG00000169397
			beta Actin	ACTB	ENSG00000075624
			Collagen type I, α1 chain	COL1A1	ENSG00000108821
			Complement C3	C3	ENSG00000125730
			Collagen type I, α2 chain	COL1A2	ENSG00000164692
			Histidine-rich glycoprotein	HRG	ENSG00000113905
			Immunoglobulin kappa light chain	None-specific	None-specific
			Lactoferrin	LTF	ENSG00000012223
			Limitrin	MXRA8	ENSG00000162576
			Myeloperoxidase	MPO	ENSG00000005381
			Myosin heavy chain IIa (nonmuscle)	MYH9	ENSG00000100345
			Serum amyloid P	APCS	ENSG00000132703
			Transferrin	TF	ENSG00000091513
			α1 B glycoprotein	A1BG	ENSG00000121410
			Clusterin	CLU	ENSG00000120885
			Heat shock 27-kDa protein	HSPB1	ENSG00000106211
			Glyceraldehyde 3P dehydrogenase	GAPDH	ENSG00000111640
			α Tubulin	None-specific	None-specific
			Calgranulin C	S100A12	ENSG00000163221
			Carbonic anhydrase I	CA1	ENSG00000133742
			Cathepsin G	CTSG	ENSG00000100448
			Fibrinogen α chain	FGA	ENSG00000171560
			Fibrinogen beta chain	FGB	ENSG00000171564
			Ig light chain	None-specific	None-specific
			Kininogen 1	KNG1	ENSG00000113889
			Antithrombin	SERPINC1	ENSG00000117601
			Dimethyl-arginine-aminohydrolase 2	DDAH2	ENSG00000213722
			Fibronectin	FN1	ENSG00000115414
			Haptoglobin	HP	ENSG00000257017
			Ig heavy chain	None-specific	None-specific
			IgG light chain	None-specific	None-specific
			Insulin-like growth factor 1	IGF1	ENSG00000017427
			Lectin, mannose-binding 2	LMAN2	ENSG00000169223
			Lysozyme	LYZ	ENSG00000090382
			MASP-2	MASP2	ENSG00000009724
			MYL-1	MYL1	ENSG00000168530
		CaP (45)	Calgranulin B	S100A9	ENSG00000163220
			Calgranulin A	S100A8	ENSG00000143546
			Hemoglobin α chain	HBA1	ENSG00000206172
				HBA2	ENSG00000188536
			Hemoglobin beta chain	HBB	ENSG00000244734
			Albumin	ALB	ENSG00000163631
			Fibrinogen gamma chain	FGG	ENSG00000171557
			Tamm-Horsfall protein	UMOD	ENSG00000169344
			α1 Antitrypsin	SERPINA1	ENSG00000197249
			Vitronectin	VTN	ENSG00000109072
			Defensin α-1	DEFA1	ENSG00000206047
			Osteopontin	SPP1	ENSG00000118785
			Plasminogen	PLG	ENSG00000122194
			Apolipoprotein D	APOD	ENSG00000189058
			Eosinophilic cationic protein	RNASE3	ENSG00000169397
			beta Actin	ACTB	ENSG00000075624
			Collagen type I, α1 chain	COL1A1	ENSG00000108821
			Complement C3	C3	ENSG00000125730
			Histidine-rich glycoprotein	HRG	ENSG00000113905
			Immunoglobulin kappa	None-specific	None-specific
			Lactoferrin	LTF	ENSG00000012223
			Limitrin	MXRA8	ENSG00000162576
			Myeloperoxidase	MPO	ENSG00000005381
			Myosin heavy chain IIa (nonmuscle)	MYH9	ENSG00000100345
			Serum amyloid P	APCS	ENSG00000132703
			Transferrin	TF	ENSG00000091513
			Heat shock 27-kDa protein	HSPB1	ENSG00000106211
			Glyceraldehyde 3P dehydrogenase	GAPDH	ENSG00000111640
			α Tubulin	None-specific	None-specific
			Calgranulin C	S100A12	ENSG00000163221
			Cathepsin G	CTSG	ENSG00000100448
			IgG heavy chain	None-specific	None-specific
			Kininogen 1	KNG1	ENSG00000113889
			Protein C	PROC	ENSG00000115718
			Adenosyl-homocysteinase 2	AHCY	ENSG00000101444
			Anterior gradient protein 2	AGR2	ENSG00000106541
			Antithrombin	SERPINC1	ENSG00000117601
			Carcinoembryonic antigen	None-specific	None-specific
			Complement component 9	C9	ENSG00000113600
			Dimethyl-arginine-aminohydrolase 2	DDAH2	ENSG00000213722
			Fibronectin	FN1	ENSG00000115414
			High-mobility-group protein 2	HMGB2	ENSG00000164104
			Histone H2B	H2BC21	ENSG00000184678
			Ig heavy chain	None-specific	None-specific
			Ig lambda light chain	None-specific	None-specific
			Ig light chain	None-specific	None-specific

## Sheet: Reference-16
Years	Authors	Number of proteins	Proteins identified	Gene name	ENSEMBL: ID
2011	Kaneko et al.	32	albumin	ALB	ENSG00000163631
			cystatin-A	CSTA	ENSG00000121552
			dermicidin	DCD	ENSG00000161634
			fatty acid-binding protein	FABP4	ENSG00000170323
			psoriasin	S100A7	ENSG00000143556
			histone	None-specific	None-specific
			ubiquitin	None-specific	None-specific
			prothrombin	F2	ENSG00000180210
			protein Z	PROZ	ENSG00000126231
			osteopontin	SPP1	ENSG00000118785
			calprotectin	S100A8	ENSG00000143546
			immunoglobulin	None-specific	None-specific
			lysozyme C	LYZ	ENSG00000090382
			α-defensin 3	DEFA3	ENSG00000239839
			elastase	ELANE	ENSG00000197561
			hemoglobin	None-specific	None-specific
			cystic fibrosis antigen	S100A9	ENSG00000163220
			uromodulin	UMOD	ENSG00000169344
			α-1-B glycoprotein	A1BG	ENSG00000121410
			α-1-microglobulin	AMBP	ENSG00000106927
			mannan-binding lectin-associated protein 19	MASP2	ENSG00000009724
			lactoferrin	LTF	ENSG00000012223
			transferrin	TF	ENSG00000091513
			calreticulin	CALR	ENSG00000179218
			polyubiquitin	UBB	ENSG00000170315
				UBC	ENSG00000150991
			caspase-14	CASP14	ENSG00000105141
			γ -glutamyl hydrolase	GGH	ENSG00000137563
			serum amyloid P component	APCS	ENSG00000132703
			serine proteinase	None-specific	None-specific
			apo-AI	APOA1	ENSG00000118137
			resistin	RETN	ENSG00000104918
			histone 2H4B	None-specific	None-specific

## Sheet: Reference-17
Years	Authors	Number of proteins	Proteins identified	Gene name	ENSEMBL: ID
2012	Jou et al.	242	Myeloperoxidase	MPO	ENSG00000005381
			Serum paraoxonase/arylesterase 1	PON1	ENSG00000005421
			Lysosome-associated membrane glycoprotein 2	LAMP2	ENSG00000005893
			Uridine phosphorylase 2	UPP2	ENSG00000007001
			Rhomboid family member 1	RHBDF1	ENSG00000007384
			Synaptophysin-like protein 1	SYPL1	ENSG00000008282
			Mannan-binding lectin serine protease 2	MASP2	ENSG00000009724
			Breast cancer type 1 susceptibility protein	BRCA1	ENSG00000012048
			Lactotransferrin	LTF	ENSG00000012223
			Leukocyte elastase inhibitor	SERPINB1	ENSG00000021355
			Complement component C8 beta chain	C8B	ENSG00000021852
			5-aminolevulinate synthase, nonspecific, mitochondrial	ALAS1	ENSG00000023330
			Vimentin	VIM	ENSG00000026025
			Ceruloplasmin	CP	ENSG00000047457
			Kinesin-like protein KIF1B	KIF1B	ENSG00000054523
			Inter-alpha-trypsin inhibitor heavy chain H4	ITIH4	ENSG00000055955
			Inter-alpha-trypsin inhibitor heavy chain H1	ITIH1	ENSG00000055957
			Protein MCM10 homolog	MCM10	ENSG00000065328
			Abnormal spindle-like microcephaly-associated protein	ASPM	ENSG00000066279
			Actin, cytoplasmic 1	ACTB	ENSG00000075624
			Telomere-associated protein RIF1	RIF1	ENSG00000080345
			Heat shock protein HSP 90-alpha	HSP90AA1	ENSG00000080824
			Apolipoprotein B-100	APOB	ENSG00000084674
			CD59 glycoprotein	CD59	ENSG00000085063
			CD82 antigen	CD82	ENSG00000085117
			Carcinoembryonic antigen-related cell adhesion molecule 6	CEACAM6	ENSG00000086548
			Flavin reductase	BLVRB	ENSG00000090013
			Lysozyme C	LYZ	ENSG00000090382
			Serotransferrin	TF	ENSG00000091513
			Beta-2-glycoprotein 1	APOH	ENSG00000091583
			Heat shock protein HSP 90-beta	HSP90AB1	ENSG00000096384
			Heparin cofactor 2	SERPIND1	ENSG00000099937
			Apolipoprotein L1	APOL1	ENSG00000100342
			Myosin-9	MYH9	ENSG00000100345
			Dehydrogenase/reductase SDR family member 2	DHRS2	ENSG00000100867
			Centrosomal protein	CEP192	ENSG00000101639
			Phosphoglycerate kinase 1	PGK1	ENSG00000102144
			Sodium leak channel non-selective protein	NALCN	ENSG00000102452
			Transient receptor potential cation channel subfamily A member 1	TRPA1	ENSG00000104321
			Acid ceramidase	ASAH1	ENSG00000104763
			Carcinoembryonic antigen-related cell adhesion molecule 5	CEACAM5	ENSG00000105388
			Hsp90 co-chaperone Cdc37	CDC37	ENSG00000105401
			Histone H2A.V	H2AZ2	ENSG00000105968
			Heat shock protein beta-1	HSPB1	ENSG00000106211
			PHD finger protein 14	PHF14	ENSG00000106443
			Complement C5	C5	ENSG00000106804
			Protein AMBP	AMBP	ENSG00000106927
			Leucine-rich repeat protein SHOC-2	SHOC2	ENSG00000108061
			Regulator of G-protein signaling 9	RGS9	ENSG00000108370
			Profilin-1	PFN1	ENSG00000108518
			Galectin-3-binding protein	LGALS3BP	ENSG00000108679
			Vitronectin	VTN	ENSG00000109072
			Transcription elongation factor SPT6	SUPT6H	ENSG00000109111
			ETS-related transcription factor Elf-2	ELF2	ENSG00000109381
			Heat shock cognate 71 kDa protein	HSPA8	ENSG00000109971
			Hemopexin	HPX	ENSG00000110169
			Apolipoprotein A-IV	APOA4	ENSG00000110244
			ATP synthase subunit beta, mitochondrial	ATP5F1B	ENSG00000110955
			Keratin, type I cytoskeletal 18	KRT18	ENSG00000111057
			Glyceraldehyde-3-phosphate dehydrogenase	GAPDH	ENSG00000111640
			Triosephosphate isomerase	TPI1	ENSG00000111669
			L-lactate dehydrogenase B chain	LDHB	ENSG00000111716
			mRNA-capping enzyme	RNGTT	ENSG00000111880
			Phosphatidylinositol-glycan-specific phospholipase D	GPLD1	ENSG00000112293
			Complement component C9	C9	ENSG00000113600
			Kininogen-1	KNG1	ENSG00000113889
			Histidine-rich glycoprotein	HRG	ENSG00000113905
			Girdin	CCDC88A	ENSG00000115355
			Fibronectin	FN1	ENSG00000115414
			Glutaminyl-peptide cyclotransferase	QPCT	ENSG00000115828
			Antithrombin-III	SERPINC1	ENSG00000117601
			Cathepsin D	CTSD	ENSG00000117984
			Apolipoprotein A-I	APOA1	ENSG00000118137
			Transthyretin	TTR	ENSG00000118271
			Osteopontin	SPP1	ENSG00000118785
			WD repeat-containing protein 35	WDR35	ENSG00000118965
			Protein SET	SET	ENSG00000119335
			ATP-binding cassette sub-family D member 4	ABCD4	ENSG00000119688
			Transforming growth factor-beta-induced protein ig-h3	TGFBI	ENSG00000120708
			Clusterin	CLU	ENSG00000120885
			Eosinophil peroxidase	EPX	ENSG00000121053
			Alpha-1B-glycoprotein	A1BG	ENSG00000121410
			Plasminogen	PLG	ENSG00000122194
			Tubulin alpha-1B chain	TUBA1B	ENSG00000123416
			C4b-binding protein alpha chain	C4BPA	ENSG00000123838
			Carcinoembryonic antigen-related cell adhesion molecule 8	CEACAM8	ENSG00000124469
			Serpin B6	SERPINB6	ENSG00000124570
			Complement C3	C3	ENSG00000125730
			Coagulation factor X	F10	ENSG00000126218
			Vitamin K-dependent protein Z	PROZ	ENSG00000126231
			Heat shock protein 75 kDa, mitochondrial	TRAP1	ENSG00000126602
			Fibroleukin	FGL2	ENSG00000127951
			Keratin, type I cytoskeletal 17	KRT17	ENSG00000128422
			MAP7 domain-containing protein 3	MAP7D3	ENSG00000129680
			Apolipoprotein C-I	APOC1	ENSG00000130208
			Kinesin-like protein KIF1A	KIF1A	ENSG00000130294
			Argininosuccinate synthase	ASS1	ENSG00000130707
			Nesprin-1	SYNE1	ENSG00000131018
			Adenylyl cyclase-associated protein 1	CAP1	ENSG00000131236
			Napsin-A	NAPSA	ENSG00000131400
			Kinesin-like protein KIF3A	KIF3A	ENSG00000131437
			Creatine kinase S-type, mitochondrial	CKMT2	ENSG00000131730
			Pigment epithelium-derived factor	SERPINF1	ENSG00000132386
			Immunoglobulin J chain	JCHAIN	ENSG00000132465
			Serum amyloid P-component	APCS	ENSG00000132703
			Stomatin-like protein 3	STOML3	ENSG00000133115
			Carbonic anhydrase 1	CA1	ENSG00000133742
			Grainyhead-like protein 1 homolog	GRHL1	ENSG00000134317
			Annexin A1	ANXA1	ENSG00000135046
			CD63 antigen	CD63	ENSG00000135404
			Keratin, type II cuticular Hb5	KRT85	ENSG00000135443
			Keratin, type II cytoskeletal 7	KRT7	ENSG00000135480
			Cytoplasmic dynein 1 light intermediate chain 2	DYNC1LI2	ENSG00000135720
			Angiotensinogen	AGT	ENSG00000135744
			Filamin-B	FLNB	ENSG00000136068
			Acidic leucine-rich nuclear phosphoprotein 32 family member B	ANP32B	ENSG00000136938
			Ras-related protein Rab-1A	RAB1A	ENSG00000138069
			Protein Shroom3	SHROOM3	ENSG00000138771
			Pro-epidermal growth factor	EGF	ENSG00000138798
			Ras-related protein Rab-15	RAB15	ENSG00000139998
			Clathrin heavy chain 1	CLTC	ENSG00000141367
			Secreted and transmembrane protein 1	SECTM1	ENSG00000141574
			Collagen alpha-1(VI) chain	COL6A1	ENSG00000142156
			Protein S100-A8	S100A8	ENSG00000143546
			Ubiquitin-40S ribosomal protein S27a	RPS27A	ENSG00000143947
			Alpha-2-HS-glycoprotein	AHSG	ENSG00000145192
			Vitamin D-binding protein	GC	ENSG00000145321
			PH-interacting protein	PHIP	ENSG00000146247
			Malate dehydrogenase, mitochondrial	MDH2	ENSG00000146701
			FERM and PDZ domain-containing protein 3	FRMPD3	ENSG00000147234
			Erythrocyte band 7 integral membrane protein	STOM	ENSG00000148175
			Gelsolin	GSN	ENSG00000148180
			Plasma protease C1 inhibitor	SERPING1	ENSG00000149131
			T-complex protein 1 subunit epsilon	CCT5	ENSG00000150753
			Inter-alpha-trypsin inhibitor heavy chain H2	ITIH2	ENSG00000151655
			Otoancorin	OTOA	ENSG00000155719
			Elongation factor 1-alpha 1	EEF1A1	ENSG00000156508
			Apolipoprotein A-II	APOA2	ENSG00000158874
			Complement C1q subcomponent subunit C	C1QC	ENSG00000159189
			Complement C1r subcomponent	C1R	ENSG00000159403
			Lamin-A/C	LMNA	ENSG00000160789
			60S ribosomal protein L8	RPL8	ENSG00000161016
			B-cell CLL/lymphoma 6 member B protein	BCL6B	ENSG00000161940
			Coiled-coil domain-containing protein 78	CCDC78	ENSG00000162004
			60S ribosomal protein L29	RPL29	ENSG00000162244
			Matrix-remodeling-associated protein 8	MXRA8	ENSG00000162576
			Protein S100-A11	S100A11	ENSG00000163191
			Protein S100-A9	S100A9	ENSG00000163220
			Protein S100-A12	S100A12	ENSG00000163221
			Serum albumin	ALB	ENSG00000163631
			Transketolase	TKT	ENSG00000163931
			Protein S100-P	S100P	ENSG00000163993
			15-hydroxyprostaglandin dehydrogenase [NAD+]	HPGD	ENSG00000164120
			Arfaptin-1	ARFIP1	ENSG00000164144
			MICAL-like protein 2	MICALL2	ENSG00000164877
			Dapper homolog 1	DACT1	ENSG00000165617
			Complement C2	C2	ENSG00000166278
			Tripeptidyl-peptidase 1	TPP1	ENSG00000166340
			Beta-2-microglobulin	B2M	ENSG00000166710
			Myosin-Vb	MYO5B	ENSG00000167306
			Prostate stem cell antigen	PSCA	ENSG00000167653
			Lymphocyte antigen 6D	LY6D	ENSG00000167656
			Alpha-2-antiplasmin	SERPINF2	ENSG00000167711
			Keratin, type II cytoskeletal 1	KRT1	ENSG00000167768
			Peroxiredoxin-2	PRDX2	ENSG00000167815
			Vesicular integral-membrane protein VIP36	LMAN2	ENSG00000169223
			Uromodulin	UMOD	ENSG00000169344
			Eosinophil cationic protein	RNASE3	ENSG00000169397
			Fatty acid synthase	FASN	ENSG00000169710
			Keratin, type II cytoskeletal 8	KRT8	ENSG00000170421
			Keratin, type II cytoskeletal 75	KRT75	ENSG00000170454
			Keratin, type II cytoskeletal 4	KRT4	ENSG00000170477
			Transmembrane channel-like protein 7	TMC7	ENSG00000170537
			Keratin, type I cytoskeletal 19	KRT19	ENSG00000171345
			Keratin, type I cytoskeletal 15	KRT15	ENSG00000171346
			Keratin, type I cytoskeletal 13	KRT13	ENSG00000171401
			Keratin, type I cytoskeletal 9	KRT9	ENSG00000171403
			Fibrinogen gamma chain	FGG	ENSG00000171557
			Fibrinogen alpha chain	FGA	ENSG00000171560
			Fibrinogen beta	FGB	ENSG00000171564
			Ras-related protein Rab-33B	RAB33B	ENSG00000172007
			Azurocidin	AZU1	ENSG00000172232
			Synaptopodin-2	SYNPO2	ENSG00000172403
			Keratin, type II cytoskeletal 2 epidermal	KRT2	ENSG00000172867
			Heat shock 70 kDa protein 6	HSPA6	ENSG00000173110
			Potassium channel subfamily K member 7	KCNK7	ENSG00000173338
			Complement C1q subcomponent subunit B	C1QB	ENSG00000173369
			von Willebrand factor A domain-containing protein 3A	VWA3A	ENSG00000175267
			Ras-related protein Rab-6A	RAB6A	ENSG00000175582
			Alpha-2-macroglobulin	A2M	ENSG00000175899
			Tubulin beta-6 chain	TUBB6	ENSG00000176014
			Cleavage stimulation factor subunit 3	CSTF3	ENSG00000176102
			Tripartite motif-containing protein 72	TRIM72	ENSG00000177238
			Galectin-7	LGALS7	ENSG00000178934
			Galectin-7	LGALS7B	ENSG00000178934
			Prothrombin	F2	ENSG00000180210
			Nucleophosmin	NPM1	ENSG00000181163
			Renin receptor	ATP6AP2	ENSG00000182220
			Complement C1s subcomponent	C1S	ENSG00000182326
			Annexin A2	ANXA2	ENSG00000182718
			Vitelline membrane outer layer protein 1 homolog	VMO1	ENSG00000182853
			MAP7 domain-containing protein 2	MAP7D2	ENSG00000184368
			Vitamin K-dependent protein S	PROS1	ENSG00000184500
			Probable ATP-dependent RNA helicase	DDX53	ENSG00000184735
			Keratin, type II cytoskeletal 6B	KRT6B	ENSG00000185479
			Mucin-1	MUC1	ENSG00000185499
			Keratin, type II cytoskeletal 79	KRT79	ENSG00000185640
			V-type proton ATPase 16 kDa proteolipid subunit	ATP6V0C	ENSG00000185883
			Lysosome-associated membrane glycoprotein 1	LAMP1	ENSG00000185896
			Keratin, type II cytoskeletal 73	KRT73	ENSG00000186049
			Keratin, type I cytoskeletal 10	KRT10	ENSG00000186395
			Keratin, type I cytoskeletal 14	KRT14	ENSG00000186847
			Histone H1t	H1-6	ENSG00000187475
			Prothymosin alpha	PTMA	ENSG00000187514
			Plasma serine protease inhibitor	SERPINA5	ENSG00000188488
			Hemoglobin subunit alpha	HBA2	ENSG00000188536
			Negative elongation factor B	NELFB	ENSG00000188986
			Apolipoprotein D	APOD	ENSG00000189058
			Keratin, type II cytoskeletal 1b	KRT77	ENSG00000189182
			Alpha-1-antichymotrypsin	SERPINA3	ENSG00000196136
			Myeloblastin	PRTN3	ENSG00000196415
			Alpha-1-antitrypsin	SERPINA1	ENSG00000197249
			Supervillin	SVIL	ENSG00000197321
			E3 ubiquitin-protein ligase MIB2	MIB2	ENSG00000197530
			Neutrophil elastase	ELANE	ENSG00000197561
			Proactivator polypeptide	PSAP	ENSG00000197746
			Protein S100-A6	S100A6	ENSG00000197956
			Histone H2A type 2-A	H2AC18	ENSG00000203812
			Phosphatase and actin regulator 4	PHACTR4	ENSG00000204138
			Collagen alpha-1(XV) chain	COL15A1	ENSG00000204291
			Keratin, type II cytoskeletal 6A	KRT6A	ENSG00000205420
			Neutrophil defensin 1	DEFA1	ENSG00000206047
			Ig alpha-1 chain C region	NA	ENSG00000211895
			Ig gamma-1 chain C region	NA	ENSG00000211896
			Ig mu chain C region	NA	ENSG00000211899
			Voltage-dependent anion-selective channel protein 1	VDAC1	ENSG00000213585
			Hemoglobin subunit gamma-1	HBG1	ENSG00000213934
			Hemoglobin subunit delta	HBD	ENSG00000223609
			Zinc finger protein 717	ZNF717	ENSG00000227124
			Alpha-1-acid glycoprotein 1	ORM1	ENSG00000229314
			Apolipoprotein C-II	APOC2	ENSG00000234906
			Complement factor B	CFB	ENSG00000239754
			Ig kappa chain V-I region DEE	NA	ENSG00000243466
			Glutathione S-transferase A13	GSTA1	ENSG00000243955
			Complement C4-A	LOC110384692	ENSG00000244731
			Complement C4-A	C4A	ENSG00000244731
			Hemoglobin subunit beta	HBB	ENSG00000244734
			Fer-1-like protein 5	FER1L5	ENSG00000249715
			Haptoglobin	HP	ENSG00000257017
			Tubulin beta-3 chain	TUBB3	ENSG00000258947
			Haptoglobin-related protein s	HPR	ENSG00000261701
			39S ribosomal protein L12, mitochondrial	MRPL12	ENSG00000262814
			Histone H4	H4C6	ENSG00000274618
			Histone H2B type 1-B	H2BC3	ENSG00000276410
			Histone H2A type 1-B/E	H2AC8	ENSG00000277075
			Calmodulin	None-specific	None-specific
			Ig heavy chain V-III region HIL	IGHV3-33	ENSG00000211955
			Protein FAM178A	SLF2	ENSG00000119906
			UPF0544 protein C5orf45	MRNIP	ENSG00000161010
			Ig kappa chain C region	IGKC	ENSG00000211592
			Tubulin beta-2C chain	TUBB4B	ENSG00000188229
			Uncharacterized protein C5orf25	SIMC1	ENSG00000170085
			Histone H3-like	H3-5	ENSG00000188375
			Ig lambda chain V-I region HA	IGLV1-47	ENSG00000211648
			Uncharacterized protein KIAA0240	None-specific	None-specific
			MAM and LDL-receptor class A domain-containing protein C10orf112	MALRD1	ENSG00000204740
			Thymosin beta-4-like protein 1	None-specific	None-specific
			Ig kappa chain V-III region SIE	IGKV3-20	ENSG00000239951
			Uncharacterized protein C8orf46	VXN	ENSG00000169085
			Ubiquitin	None-specific	None-specific
			Putative double homeobox protein 2	None-specific	None-specific
			Ig kappa chain V-II region Cum	IGKV2D-40	ENSG00000251039
			Uncharacterized protein C14orf43	MIDEAS	ENSG00000156030
			Ig lambda chain C regions	None-specific	None-specific
			Ig lambda chain V-III region LOI	IGLV3-21	ENSG00000211662
			Sialic acid-binding Ig-like lectin 16	None-specific	None-specific
			Putative 40S ribosomal protein S10-like	RPS10P5	ENSG00000101278
			Ig lambda-2 chain C regions	None-specific	None-specific
			Stone protein matrix (at least detected in 3 of 5 stones)：73
			Alpha-1-antitrypsin	SERPINA1	ENSG00000197249
			Antithrombin-III	SERPINC1	ENSG00000117601
			Apolipoprotein A-I	APOA1	ENSG00000118137
			Apolipoprotein D	APOD	ENSG00000189058
			Clusterin	CLU	ENSG00000120885
			Fibrinogen alpha chain	FGA	ENSG00000171560
			Fibrinogen beta chain	FGB	ENSG00000171564
			Fibronectin	FN1	ENSG00000115414
			Hemoglobin subunit alpha	HBA1	ENSG00000206172
				HBA2	,ENSG00000188536
			Hemoglobin subunit beta	HBB	ENSG00000244734
			Hemoglobin subunit delta	HBD	ENSG00000223609
			Ig kappa chain C region	IGKC	ENSG00000211592
			Interalpha-trypsin inhibitor heavy chain H1	ITIH1	ENSG00000055957
			Keratin, type II cytoskeletal 1	KRT1	ENSG00000167768
			Keratin, type II cytoskeletal 7	KRT7	ENSG00000135480
			Keratin, type II cytoskeletal 8	KRT8	ENSG00000170421
			Serum paraoxonase/arylesterase 1	PON1	ENSG00000005421
			Uromodulin	UMOD	ENSG00000169344
			Vitronectin	VTN	ENSG00000109072
			Alpha-1-acid glycoprotein 1	ORM1	ENSG00000229314
			Alpha-1B-glycoprotein	A1BG	ENSG00000121410
			Alpha-1-antichymotrypsin	SERPINA3	ENSG00000196136
			Actin, cytoplasmic 1	ACTB	ENSG00000075624
			Protein AMBP	AMBP	ENSG00000106927
			Apolipoprotein B-100	APOB	ENSG00000084674
			Acid ceramidase	ASAH1	ENSG00000104763
			Carcino-embryonic antigen-related cell adhesion molecule 6	CEACAM6	ENSG00000086548
			Complement C3	C3	ENSG00000125730
			Fibrinogen gamma chain	FGG	ENSG00000171557
			Glyceraldehyde-3-phosphate dehydrogenase	GAPDH	ENSG00000111640
			Hemoglobin subunit gamma-1	HBG1	ENSG00000213934
			Hemopexin	HPX	ENSG00000110169
			Heparin cofactor 2	SERPIND1	ENSG00000099937
			Plasma protease C1 inhibitor	SERPING1	ENSG00000149131
			Ig alpha-1 chain C region	IGHA1	ENSG00000211895
			Interalpha-trypsin inhibitor heavy chain H4	ITIH4	ENSG00000055955
			Keratin, type I cytoskeletal 19	KRT19	ENSG00000171345
			Keratin, type I cytoskeletal 9	KRT9	ENSG00000171403
			Ig kappa chain V–III region SIE	None-specific	None-specific
			Lysosome-associated membrane glycoprotein 1	LAMP1	ENSG00000185896
			Mannan-binding lectin serine protease 2	MASP2	ENSG00000009724
			Matrix-remodeling-associated protein 8	MXRA8	ENSG00000162576
			Protein S100-P	S100P	ENSG00000163993
			Protein S100-A8	S100A8	ENSG00000143546
			Protein S100-A9	S100A9	ENSG00000163220
			Serum amyloid P-component	APCS	ENSG00000132703
			Serum albumin	ALB	ENSG00000163631
			Apolipoprotein A-IV	APOA4	ENSG00000110244
			Apolipoprotein C-I	APOC1	ENSG00000130208
			CD63 antigen	CD63	ENSG00000135404
			Complement factor B	CFB	ENSG00000243649
			Complement C4-A	C4A	ENSG00000244731
			Collagen alpha-1XV chain	COL15A1	ENSG00000204291
			Neutrophil elastase	ELANE	ENSG00000197561
			Histone H4	H4C14	ENSG00000270882
			Haptoglobin	HP	ENSG00000257017
			Histidine-rich glycoprotein	HRG	ENSG00000113905
			Heat shock cognate 71-kDa protein	HSPA8	ENSG00000109971
			Heat shock protein beta-1	HSPB1	ENSG00000106211
			Ig gamma-1 chain C region	IGHG1	ENSG00000211896
			Plasma serine protease inhibitor	SERPINA5	ENSG00000188488
			Keratin, type I cytoskeletal 10	KRT10	ENSG00000186395
			Keratin, type I cytoskeletal 13	KRT13	ENSG00000171401
			Keratin, type I cytoskeletal 18	KRT18	ENSG00000111057
			Keratin, type II cytoskeletal 1b	KRT77	ENSG00000189182
			Vesicular integral-membrane protein VIP36	LMAN2	ENSG00000169223
			Nucleophosmin	NPM1	ENSG00000181163
			Osteopontin	SPP1	ENSG00000118785
			Regulator of G protein signaling 9	RGS9	ENSG00000108370
			Protein S100-A6	S100A6	ENSG00000197956
			Protein S100-A11	S100A11	ENSG00000163191
			Transthyretin	TTR	ENSG00000118271
			Von Willebrand factor A domain-containing protein 3A	VWA3A	ENSG00000175267

[truncated: 10 more sheets: Reference-18, Reference-19, Reference-20, Reference-21, Reference-22, Reference-23, Reference-24, Reference-25, Reference-26, Total proteins]
