# Supplementary material for: Proteomic analysis reveals some common proteins in the kidney stone matrix
Source: PeerJ journal article supplement (doi:10.7717/peerj.11872), 2021-07-27
Supplement: Supplementary_file-2.pdf [file Supplementary_file-2.pdf]

| <b>ID</b> | <b>Age (y)</b> | <b>Gender</b> | <b>Stone type</b>                                       | <b>Renal clear cell carcinoma</b> | <b>Hypertension</b> | <b>Diabetes</b> |
|-----------|----------------|---------------|---------------------------------------------------------|-----------------------------------|---------------------|-----------------|
| Control-1 | 47             | Male          | -                                                       | Yes                               | No                  | No              |
| Control-2 | 43             | Male          | -                                                       | Yes                               | Yes                 | No              |
| Control-3 | 57             | Male          | -                                                       | Yes                               | No                  | No              |
| Stone-1   | 53             | Male          | Calcium oxalate monohydrate/carbonate apatite phosphate | No                                | No                  | No              |
| Stone-2   | 50             | Male          | Calcium oxalate monohydrate/carbonate apatite phosphate | No                                | No                  | No              |
| Stone-3   | 45             | Female        | Calcium oxalate monohydrate/carbonate apatite phosphate | No                                | Yes                 | No              |

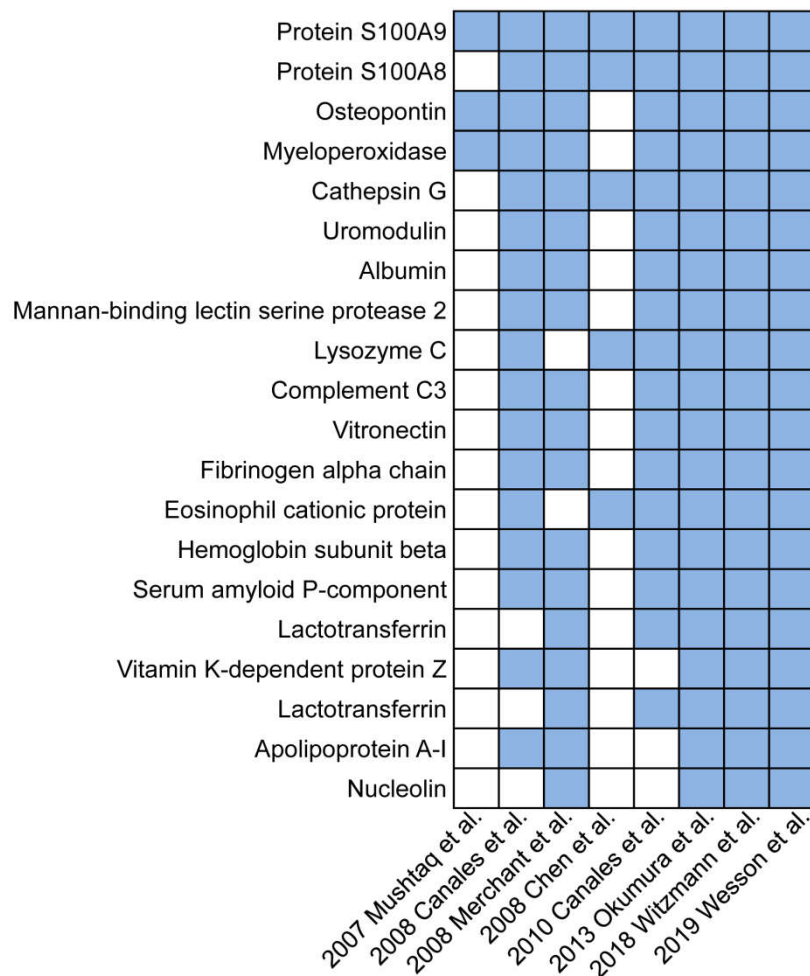

**Figure S1. The 20 most common proteins in calcium oxalate stone matrix.**
